# Supplementary material for: DogCatcher allows loop-friendly protein-protein ligation
Source: PubMed Central journal article supplement (PMC8878318; doi:10.1016/j.chembiol.2021.07.005), 2022-02-17
Supplement: mmc1.pdf [file mmc1.pdf]

**Cell Chemical Biology, Volume 29**

**Supplemental information**

**DogCatcher allows loop-friendly  
protein-protein ligation**

**Anthony H. Keeble, Vikash K. Yadav, Matteo P. Ferla, Claudia C. Bauer, Eulashini  
Chuntharpursat-Bon, Jin Huang, Robin S. Bon, and Mark Howarth**

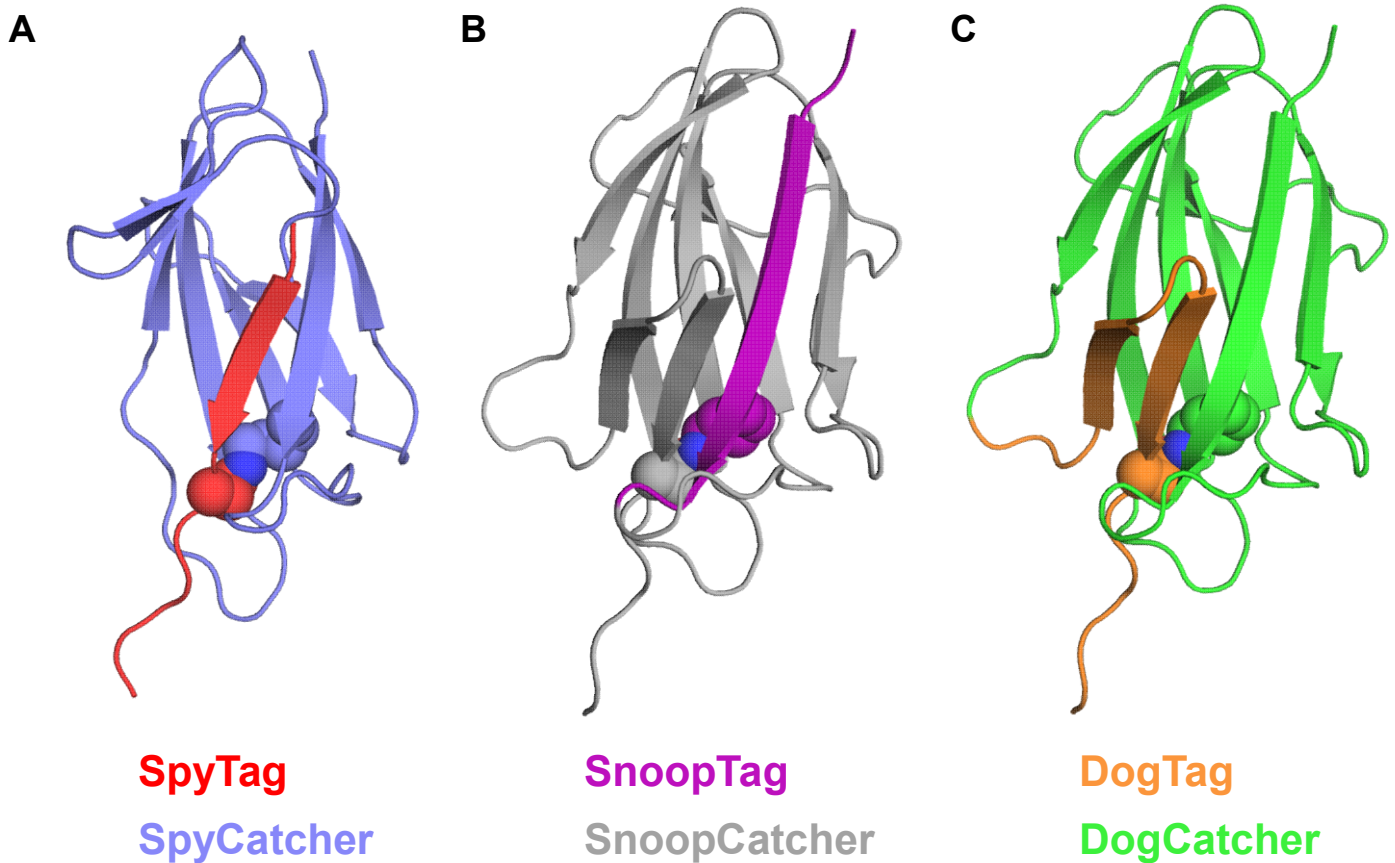

**Figure S1: Structural comparison of the different Tag/Catcher pairs, related to Figure 1.** (A) SpyTag/SpyCatcher has the Tag as a linear single  $\beta$ -strand (PDB: 2X5P and 4MLI). The isopeptide-forming residues of SpyTag (Asp117) and SpyCatcher (Lys31) are shown as spheres. (B) Model of SnoopTag/SnoopCatcher based on RrgA domain 4 (PDB: 2WW8). SnoopTag has the Tag derived from a linear single  $\beta$ -strand. The isopeptide-forming residues of SnoopTag (Lys742) and SnoopCatcher (Asn854) are shown as spheres. (C) Model of DogTag/DogCatcher based on RrgA domain 4 (PDB: 2WW8). DogTag/DogCatcher has the Tag derived from two  $\beta$ -strands arranged as a  $\beta$ -hairpin. The side-chains for the isopeptide-forming residues of the DogTag (Asn854) and DogCatcher (Lys742) are shown as spheres. The dark blue sphere indicates the nitrogen atom in the isopeptide bond.

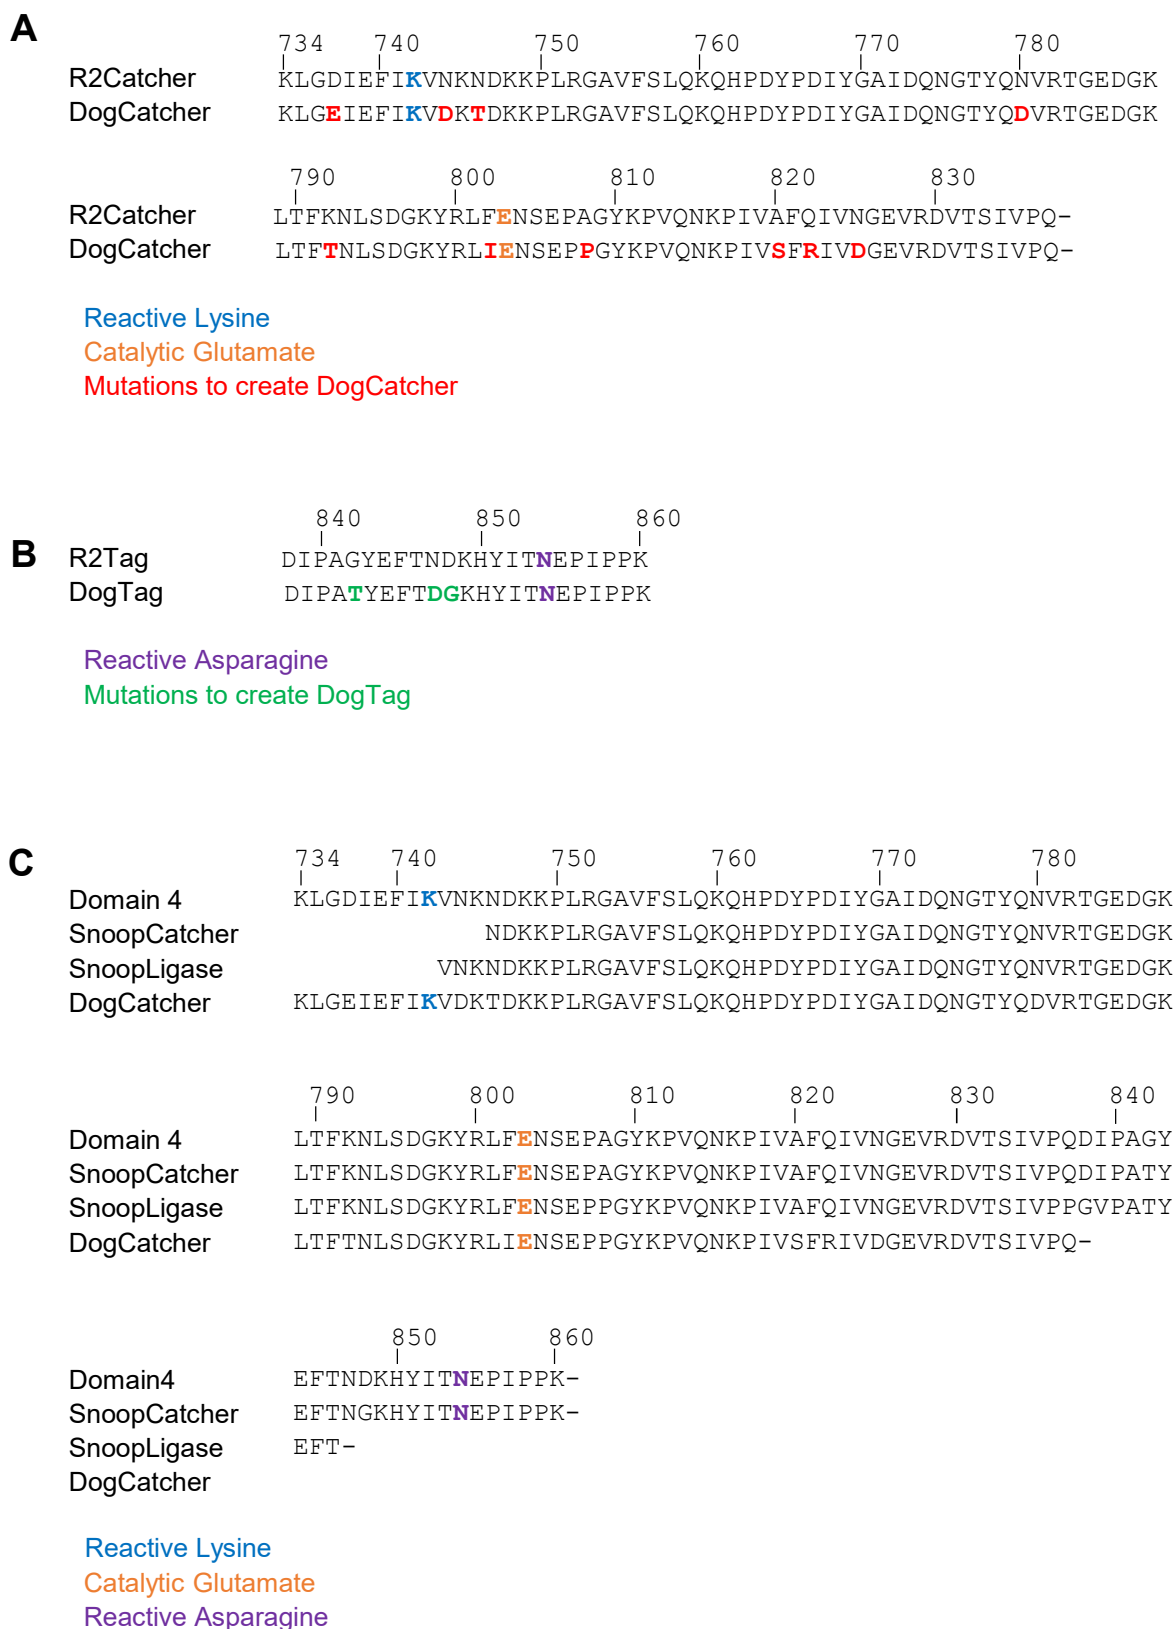

**Figure S2: Amino acid sequences of the key protein variants, related to Figure 1. (A)** Sequence alignment of R2Catcher with DogCatcher. **(B)** Sequence alignment of R2Tag with DogTag. **(C)** Sequence alignments of the ways that RrgA domain 4 has been split to create different protein coupling reagents. Numbering is based on PDB 2WW8.

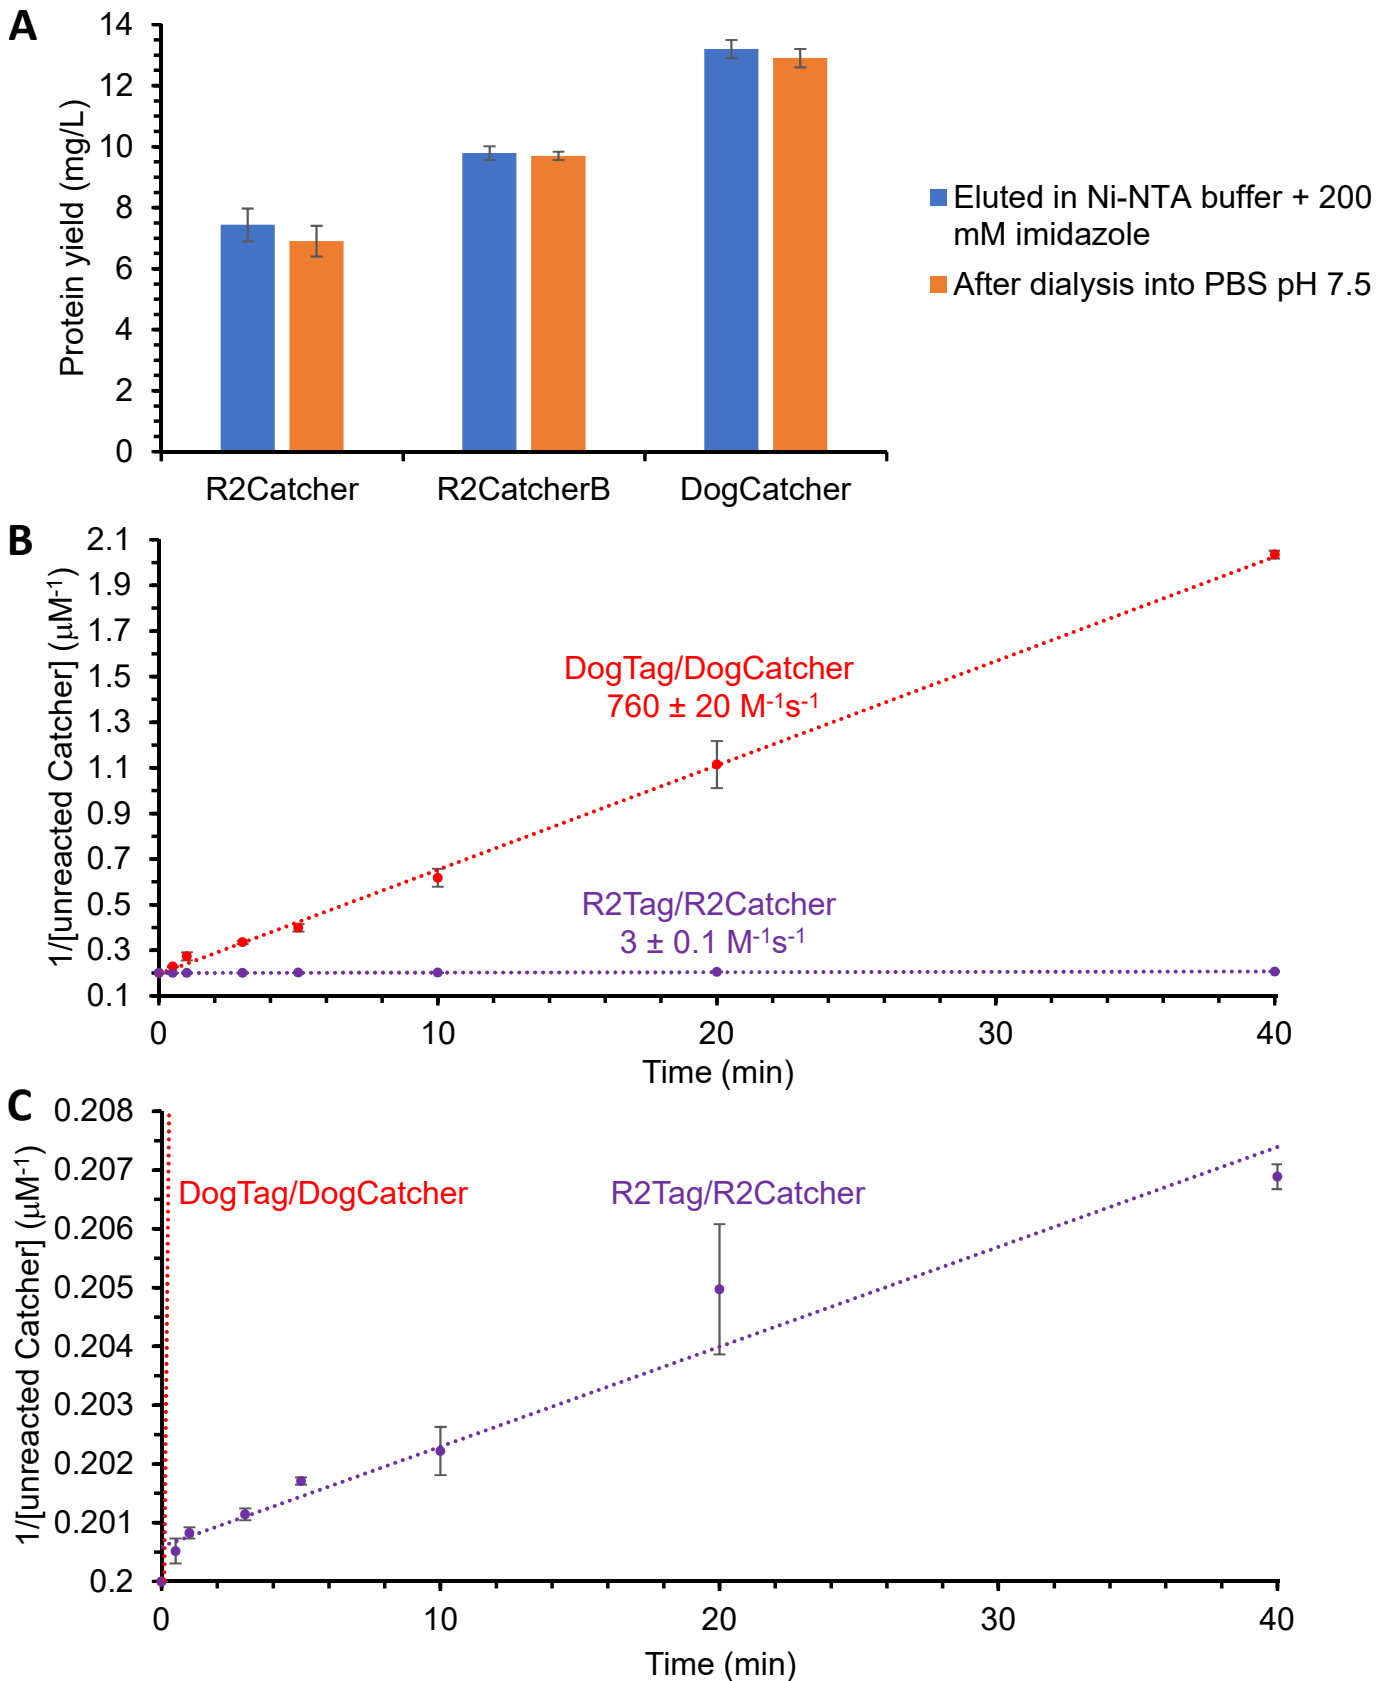

**Figure S3: Comparison of solubility and reaction rate, related to Figures 1 and 5. (A)** Yield of soluble protein for Catcher variants per liter of *E. coli* culture, determined after Ni-NTA elution (blue) or after dialysis (orange) (mean of duplicate with error bars signifying variation between measurements). **(B)** Time-course of reaction for DogTag/DogCatcher or R2Tag/R2Catcher. 5  $\mu$ M AviTag-DogTag-MBP and 5  $\mu$ M DogCatcher or 5  $\mu$ M AviTag-R2Tag-MBP and 5  $\mu$ M R2Catcher were incubated in PBS pH 7.5 at 25  $^{\circ}$ C, with quantification by SDS-PAGE/Coomassie (mean  $\pm$  1 s.d., n=3). Some error bars are too small to be visible. The resultant second-order rate constant is marked (mean  $\pm$  1 s.d., n=3). **(C)** Zoom of the y-axis from (B), to make the data clearer for R2Tag/R2Catcher.

**A**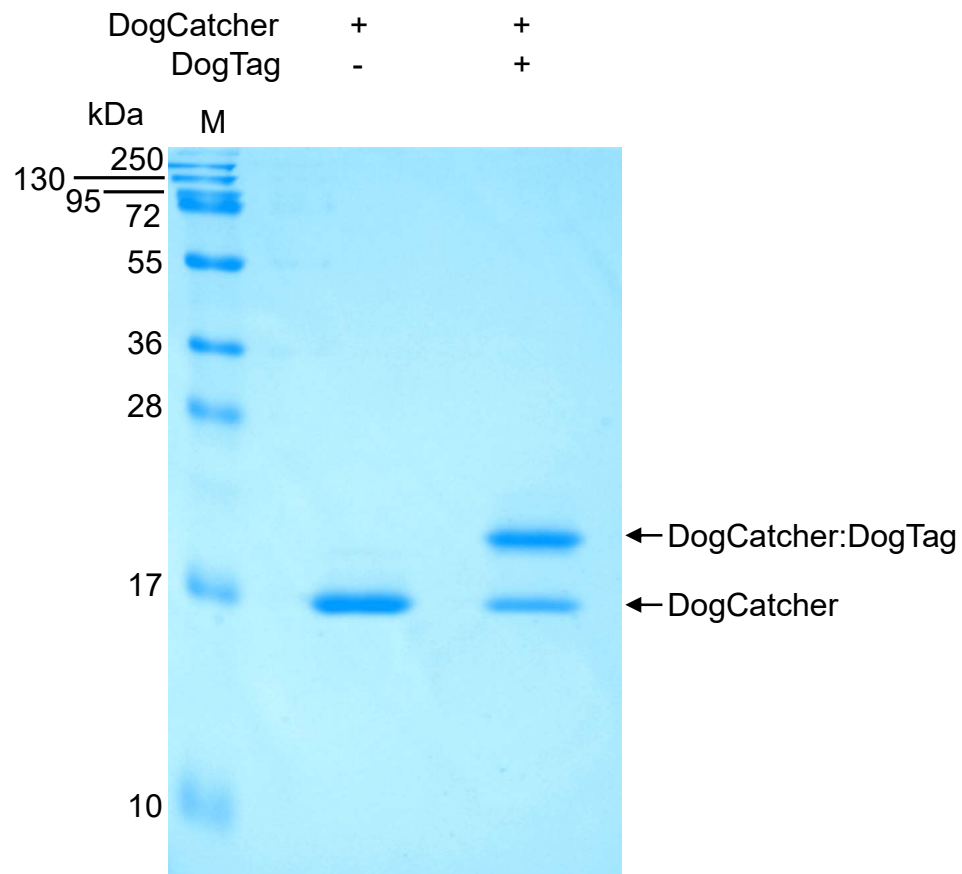**B**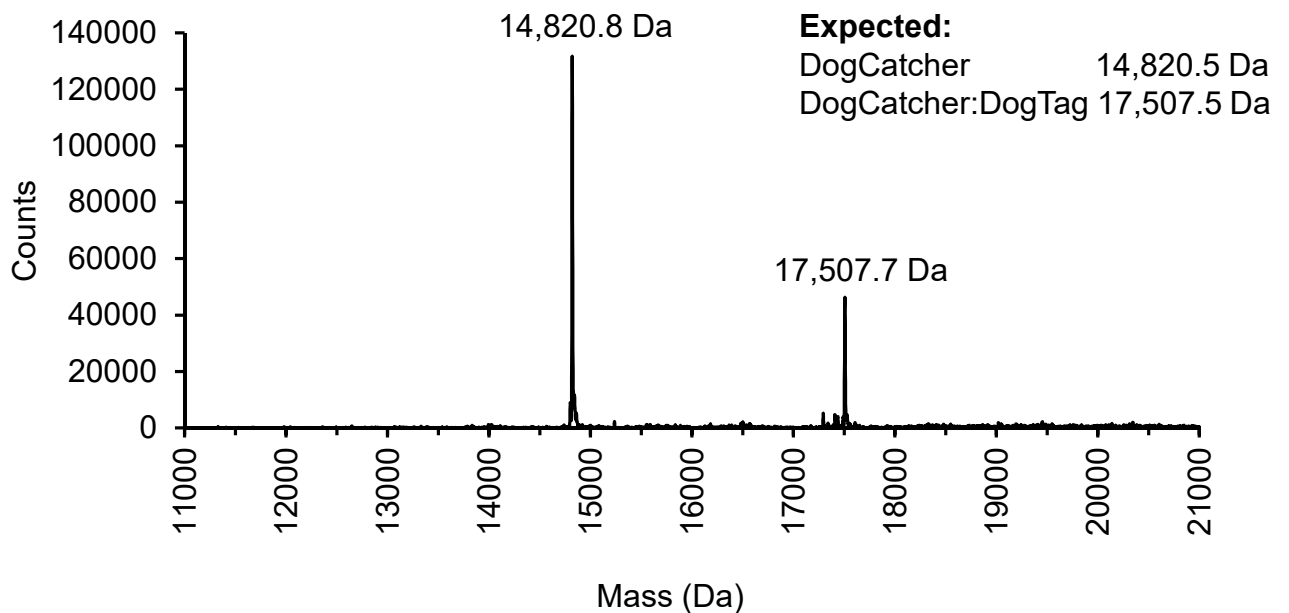

**Figure S4: Electrospray ionization mass spectrometry validation of DogCatcher and reaction with DogTag, related to Figure 1. (A)** SDS-PAGE with Coomassie staining, illustrating reaction of DogCatcher with DogTag peptide to approximately 50%, so that pre- and post-reacted DogCatcher can be compared. **(B)** Electrospray ionization mass spectrometry of DogCatcher and the reaction product of DogCatcher with DogTag peptide. Expected mass for DogTag peptide + DogCatcher = 17,524.5 Da minus 17 Da ( $\text{NH}_3$  released upon isopeptide bond formation) = 17,507.5 Da.

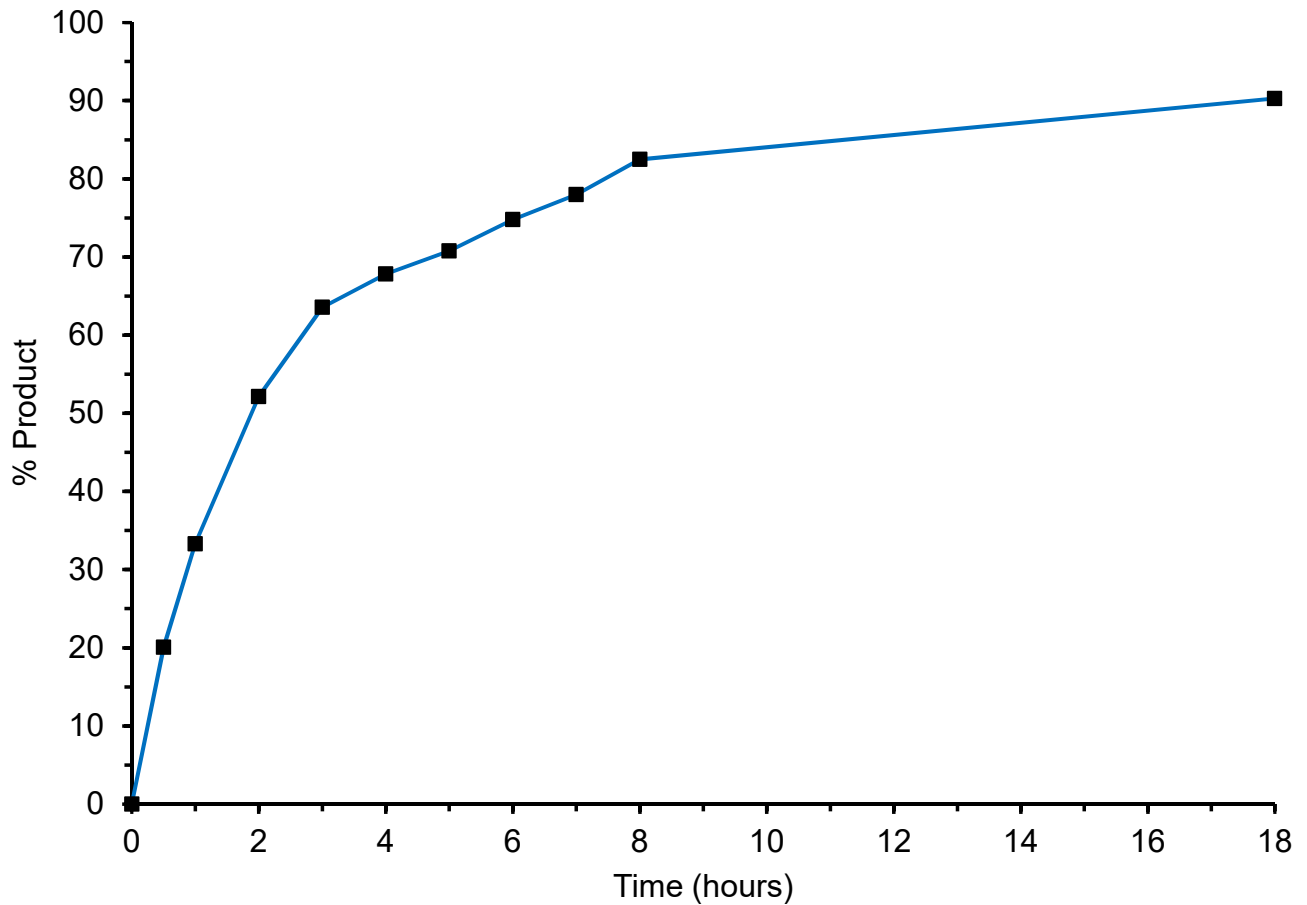

**Figure S5: DogTag/DogCatcher reacted efficiently at nanomolar concentrations, related to Figure 3.** Time-course of reaction for 100 nM HaloTag7SS-DogTag with 100 nM DogCatcher-sfGFP in PBS pH 7.5 + 0.2% (w/v) BSA at 25 °C, with quantification by SDS-PAGE/Coomassie and densitometry.

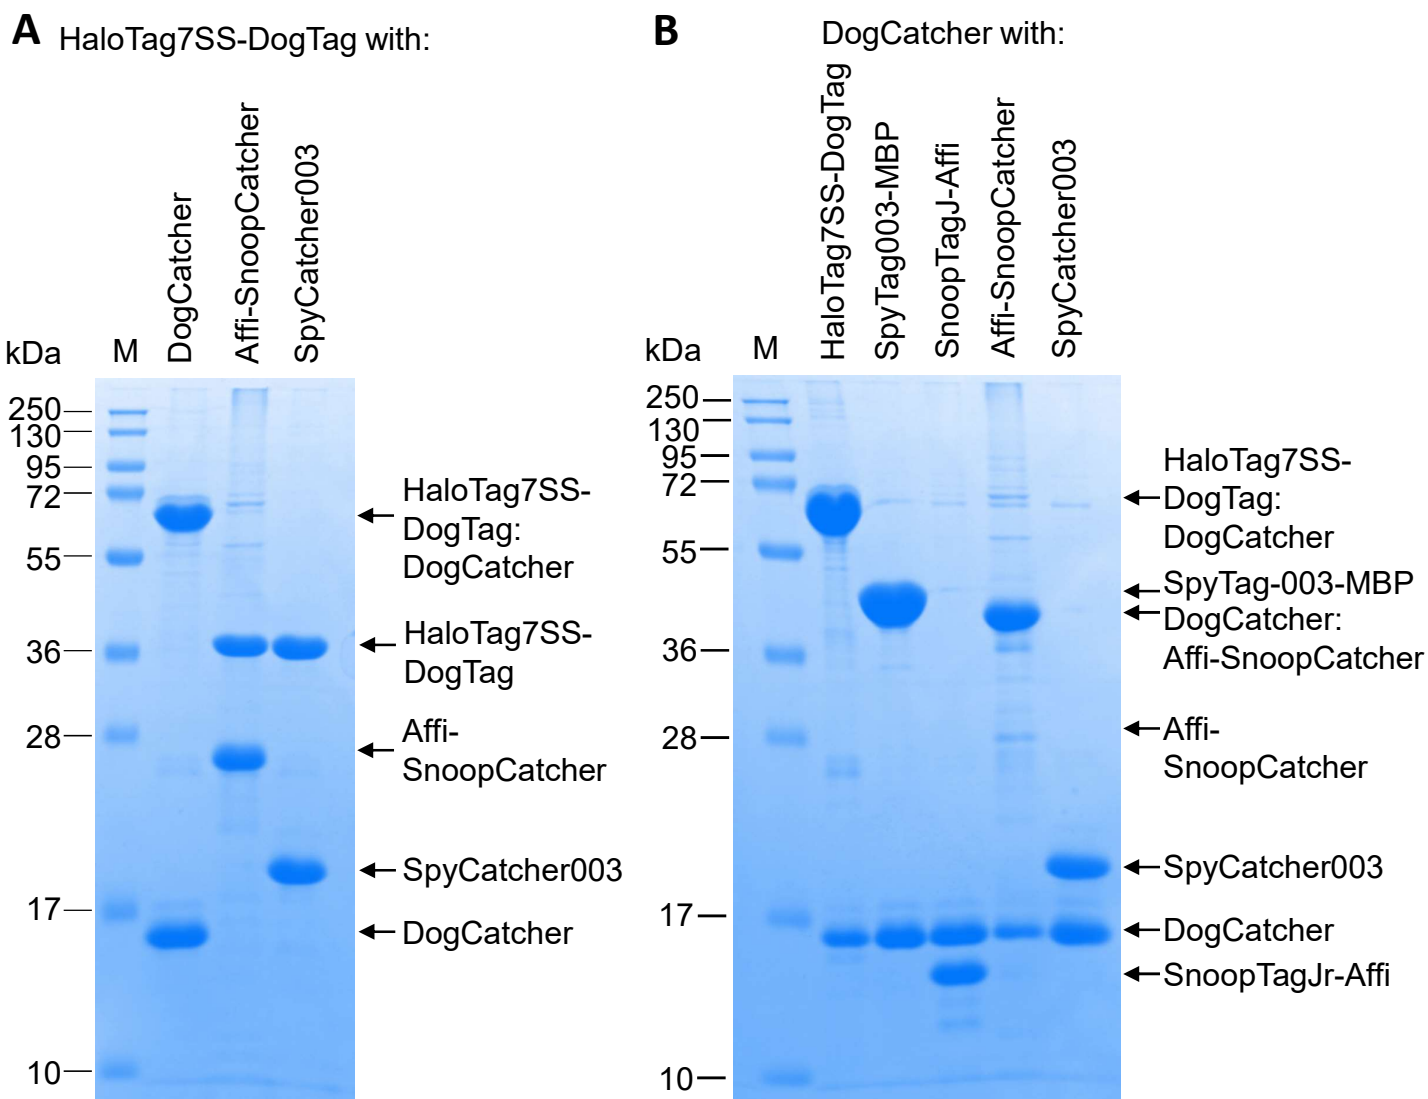

**Figure S6: DogTag/DogCatcher orthogonality, as described in STAR Methods (Isopeptide Bond Formation Assays).** (A) DogTag reacted with DogCatcher but not SnoopCatcher or SpyCatcher003. 15  $\mu$ M DogCatcher, Affi-SnoopCatcher or SpyCatcher003 was incubated with 10  $\mu$ M HaloTag7SS-DogTag for 24 h in PBS pH 7.5 at 25  $^{\circ}$ C, before SDS-PAGE with Coomassie staining. (B) DogCatcher reacted with DogTag and SnoopCatcher. 15  $\mu$ M DogCatcher was incubated with 10  $\mu$ M HaloTag7SS-DogTag, SpyTag003-MBP, SnoopTagJr-Affi, Affi-SnoopCatcher or SpyCatcher003 for 24 h in PBS pH 7.5 at 25  $^{\circ}$ C, before SDS-PAGE with Coomassie staining. M = molecular weight markers.

| <b>Gre2p Variant</b> | <b>Specific activity<br/>(<math>\mu\text{mol}_{\text{NADPH}} \cdot \text{min}^{-1} \cdot \mu\text{mol}_{\text{protein}}^{-1}</math>)</b> |
|----------------------|------------------------------------------------------------------------------------------------------------------------------------------|
| WT                   | 1,892 $\pm$ 294                                                                                                                          |
| SpyTag003 Loop A     | 2,391 $\pm$ 347                                                                                                                          |
| SpyTag003 Loop B     | 1,572 $\pm$ 372                                                                                                                          |
| SpyTag003 Loop C     | 1,814 $\pm$ 83                                                                                                                           |
| DogTag Loop A        | 3,087 $\pm$ 259                                                                                                                          |
| DogTag Loop B        | 3,268 $\pm$ 361                                                                                                                          |
| DogTag Loop C        | 1,484 $\pm$ 223                                                                                                                          |

**Table S1: Specific enzyme activities for Gre2p variants, related to Figure 6.** Each Gre2p variant was incubated with isovaleraldehyde and NADPH in phosphate buffer at 25 °C and reaction was monitored spectrophotometrically (mean  $\pm$  1 s.d., n=3 biological replicates).
